# Supplementary material for: Testing the Role of Climate Change in Species Decline: Is the Eastern Quoll a Victim of a Change in the Weather?
Source: PubMed Central journal article supplement (PMC4479380; doi:10.1371/journal.pone.0129420), 2015-06-24

(a) Full weather model

(b) Independent weather model

Annual mean temperature

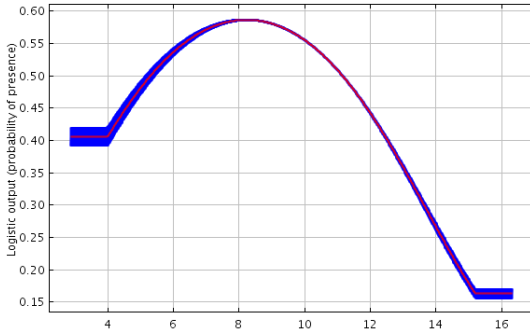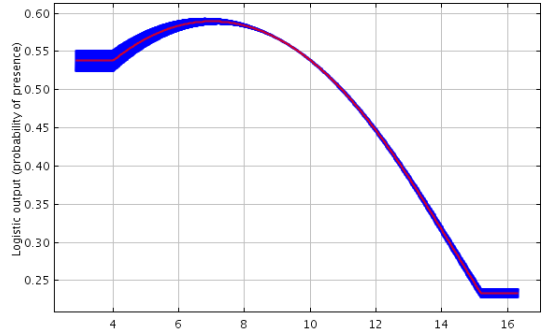

Temperature seasonality

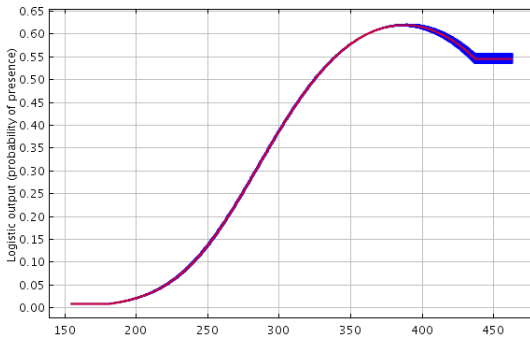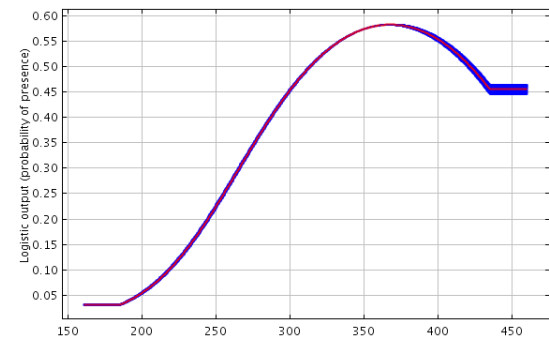

Maximum temperature of warmest month

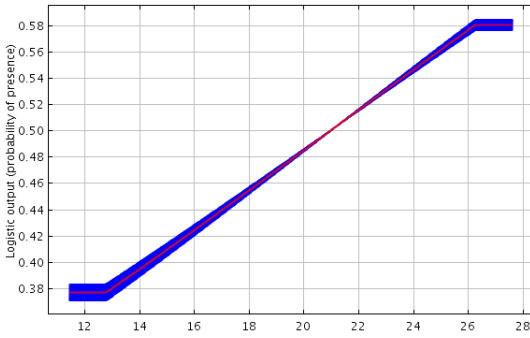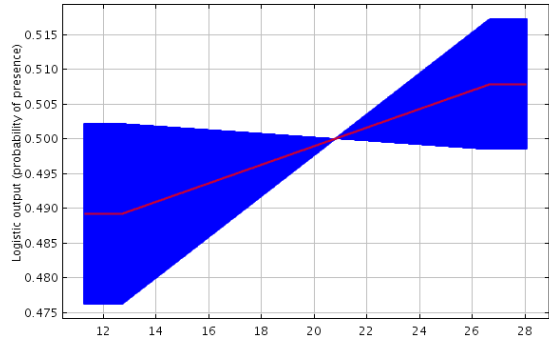

Minimum temperature of coldest month

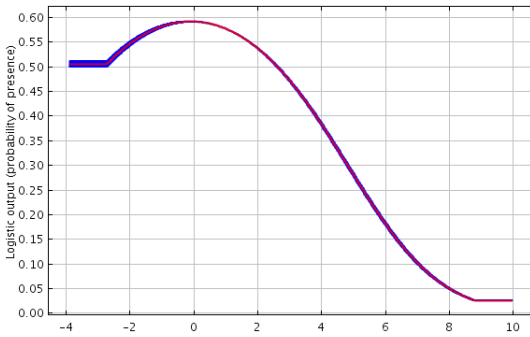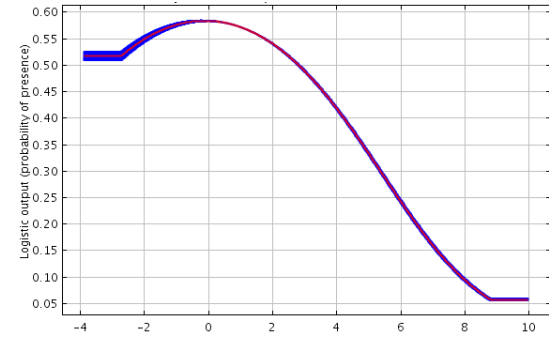

(a) Full weather model

(b) Independent weather model

Annual precipitation

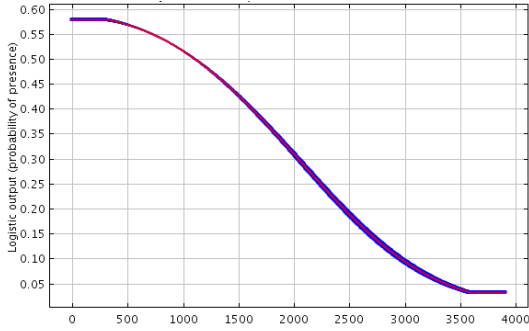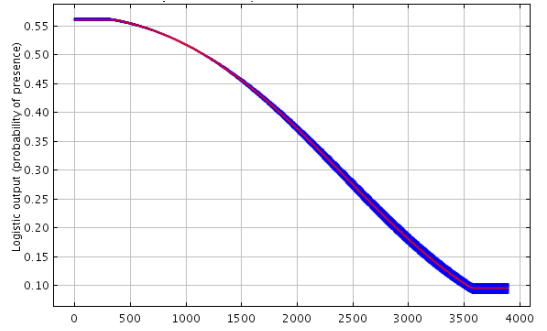

Precipitation seasonality

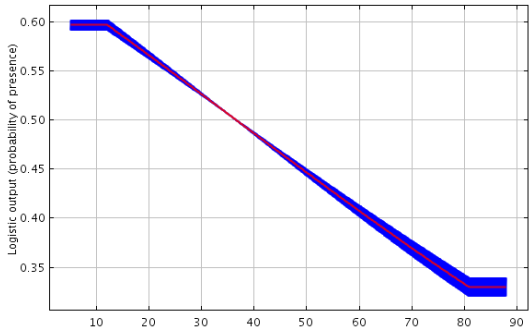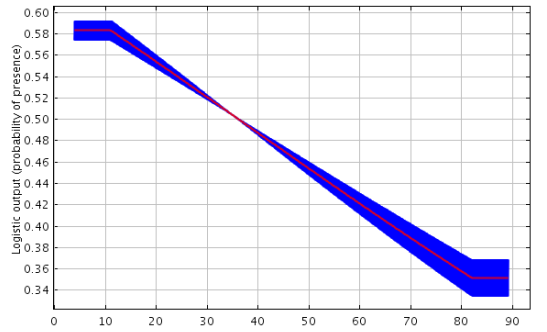

Precipitation of wettest quarter

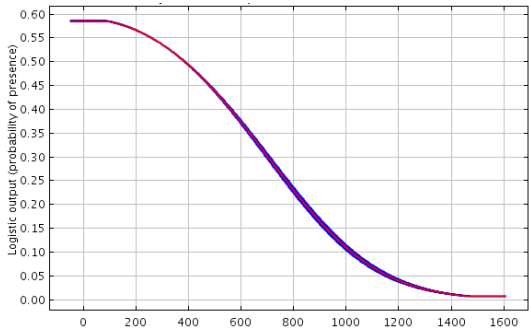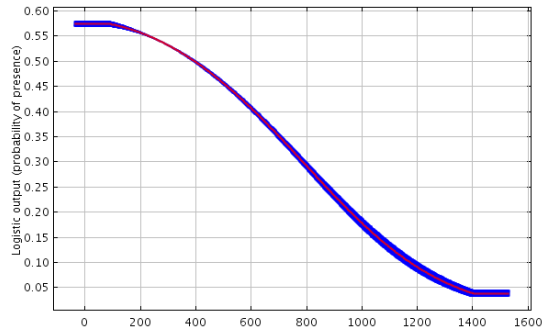

Precipitation of driest quarter

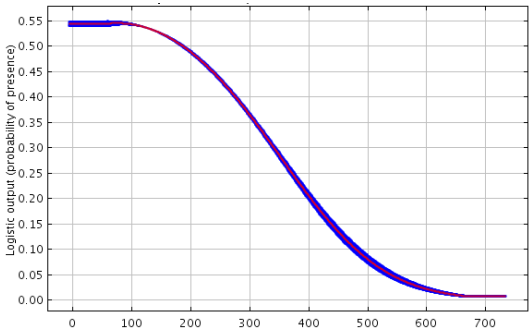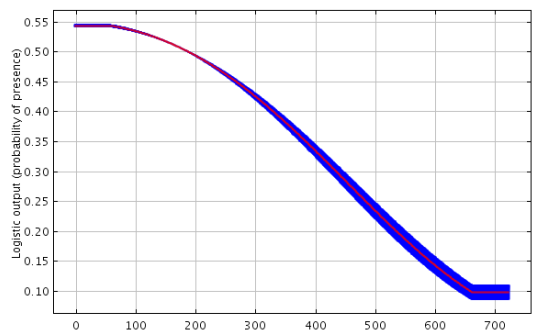

Supplement: pone.0129420.s002.pdf [file pone.0129420.s002.pdf]
