# Supplementary material for: Testing the Role of Climate Change in Species Decline: Is the Eastern Quoll a Victim of a Change in the Weather?
Source: PubMed Central journal article supplement (PMC4479380; doi:10.1371/journal.pone.0129420), 2015-06-24
Supplement: pone.0129420.s003.pdf [file pone.0129420.s003.pdf]

| (A)                                  |          | 36 month |
|--------------------------------------|----------|----------|
| Annual mean temperature (bc01)       | 12 month | 0.80     |
| Temperature seasonality (bc04)       | 12 month | 0.55     |
| Max temperature warmest month (bc05) | 12 month | 0.56     |
| Min temperature coldest month (bc06) | 12 month | 0.60     |
| Annual precipitation (bc12)          | 12 month | 0.62     |
| Precipitation seasonality (bc15)     | 12 month | 0.40     |
| Precipitation wettest quarter (bc16) | 12 month | 0.57     |
| Precipitation driest quarter (bc17)  | 12 month | 0.55     |

| (B)      | <i>bc01.12m</i> | <i>bc04.36m</i> | <i>bc05.36m</i> | <i>bc06.36m</i> | <i>bc12.36m</i> | <i>bc15.36m</i> | <i>bc16.36m</i> |
|----------|-----------------|-----------------|-----------------|-----------------|-----------------|-----------------|-----------------|
| bc04.36m | 0.28            |                 |                 |                 |                 |                 |                 |
| bc05.36m | 0.49            | 0.70            |                 |                 |                 |                 |                 |
| bc06.36m | 0.47            | (0.07)          | 0.14            |                 |                 |                 |                 |
| bc12.36m | (0.36)          | 0.00            | (0.24)          | (0.07)          |                 |                 |                 |
| bc15.36m | 0.01            | 0.03            | 0.25            | 0.13            | (0.04)          |                 |                 |
| bc16.36m | (0.19)          | 0.03            | (0.13)          | 0.16            | 0.82            | 0.39            |                 |
| bc17.36m | (0.25)          | (0.21)          | (0.47)          | (0.01)          | 0.58            | (0.61)          | 0.22            |
